# Supplementary material
Source: MDPI journal article supplement (https://www.mdpi.com/2411-5126/1/1/4)
Supplement: s1 [file s1]

Supplementary Material: Molecular and Microscopic Insights into the Formation of Soil Organic Matter in a Red Pine Rhizosphere

Alice C. Dohnalkova 1,*, Malak M. Tfaily 1, A. Peyton Smith 2, Rosalie K. Chu 1, Alex R. Crump 3, Colin J. Brislawn 2, Tamas Varga 1, Zhenqing Shi 4, Linda S. Thomashow 5, James B. Harsh 6 and C. Kent Keller 7

Experimental design

The mineral constituency of the sterile medium:

The chemical compositions of biotite and anorthite were determined by X-ray fluorescence spectrometry (XRF) and X-ray diffraction spectrometry (XRD). The XRD pattern showed the presence of minor amounts of quartz and apatite in the biotite. The XRD pattern confirmed the presence of a plagioclase with minor amounts of calcite, epidote and chlorite inclusions. From XRF analysis, the feldspar sample is Ab34An66. Both minerals were ground, and the 100–500 µm size fraction was collected, which were sonicated and rinsed in DI water. Silica sand was acid washed and rinsed with DI water. Both silica sand and minerals were dried and pasteurized at 90 ºC prior to use.

Growth conditions:

All columns were placed in a growth chamber with automatic control of temperature, light duration and intensity, and humidity, with 24–16 ºC (day–night) regime and under 16–8 h photoperiod. Sterilized DI water was supplied three times per week for each column.

Inoculum applied:

The microbial suspension was filtered through Whatman no. 1 paper and a 5 mL filtered suspension was added to each column.

The control was just the sterile medium. Unfortunately, the columns with pine seedlings in a sterile medium did not survive to the destructive sampling at 9 months.

© 2017 by the authors. License MDPI, Basel, Switzerland. This article is an open access article distributed under the terms and conditions of the Creative Commons Attribution (CC BY) (http://creativecommons.org/licenses/by/4.0/).
